# Supplementary material
Source: PubMed Central journal article supplement (PMC6805075)
Supplement: AEM.01518-19-s0001.pdf [file AEM.01518-19-s0001.pdf]

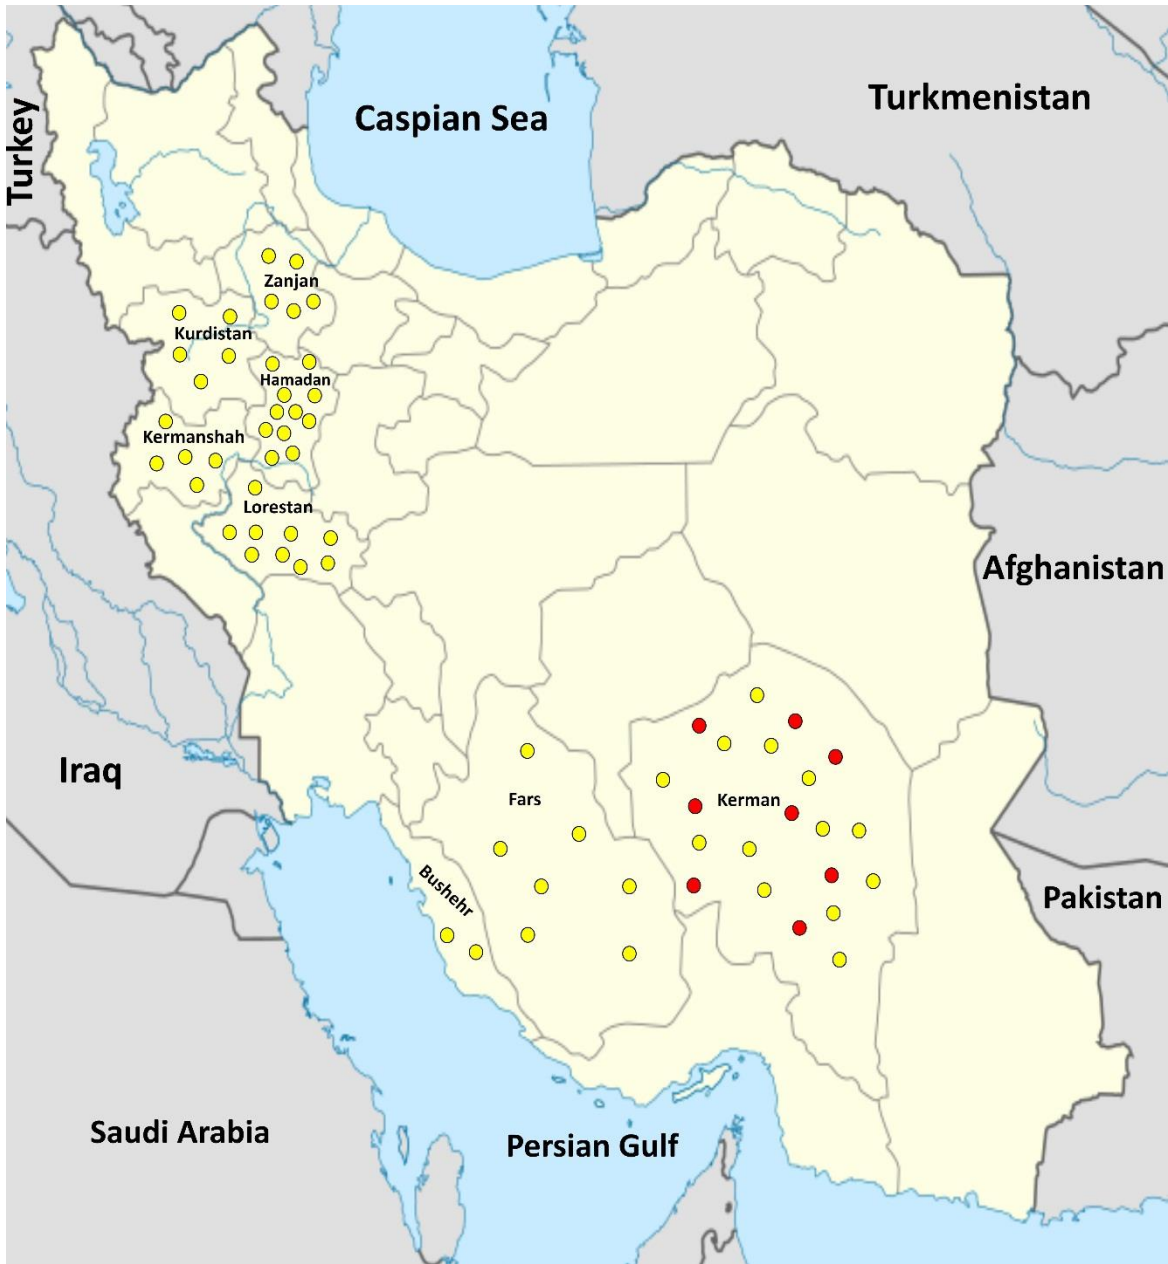

**Figure S1:** Distribution of *Xanthomonas translucens* strains isolated in this study across the wheat and barley growing areas in Iran. Each bacterial strain in Table 1 is represented by one circle on the map. Yellow circles indicate *X. translucens* pv. *undulosa* strains while red circles indicate *X. translucens* pv. *translucens* strains.

The source map is from [https://commons.wikimedia.org/wiki/File:Iran\\_location\\_map.svg](https://commons.wikimedia.org/wiki/File:Iran_location_map.svg)

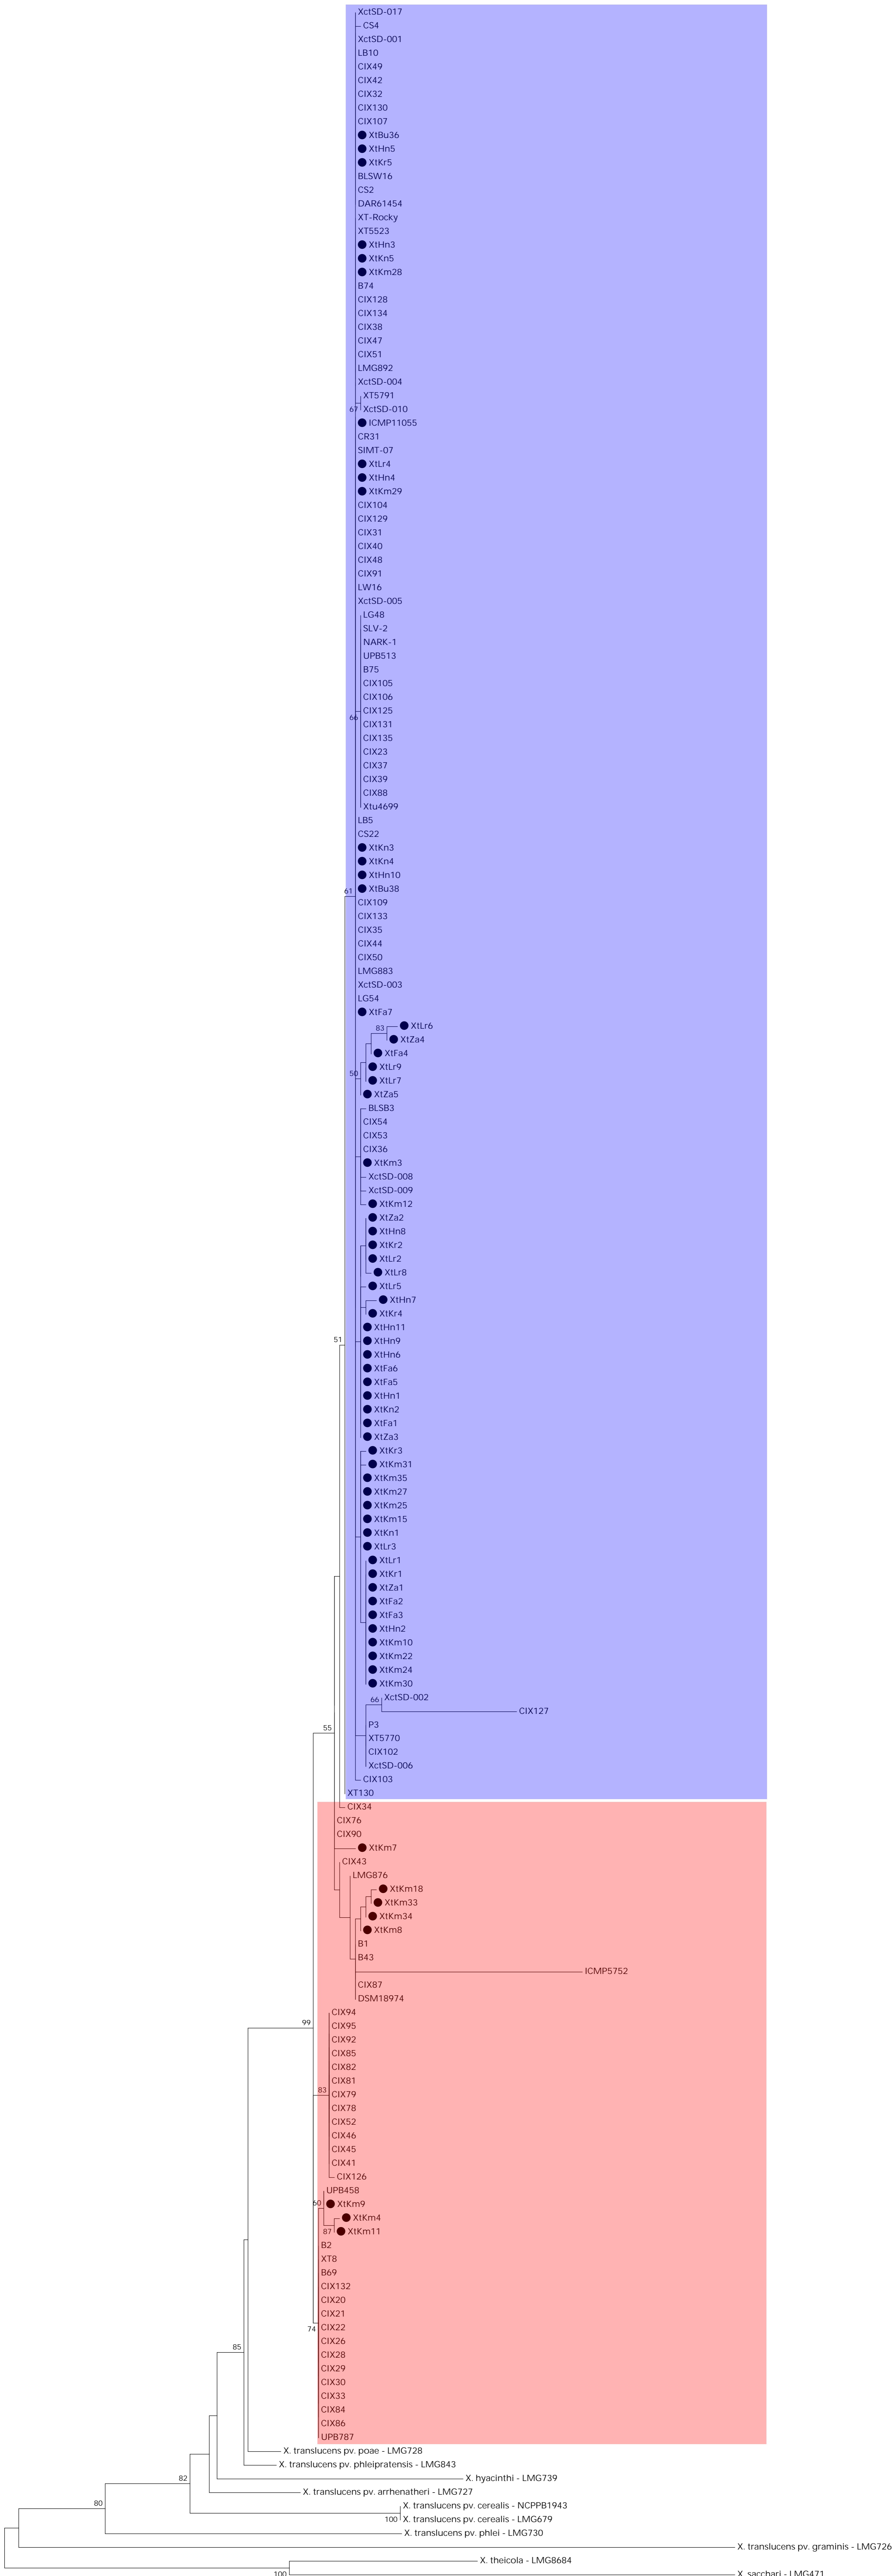

Figure S2: Phylogenetic tree generated from the concatenated partial sequences of four housekeeping genes (i.e. dnaK, fyuA, gyrB, and rpoD) in 178 *Xanthomonas translucens* strains isolated from different countries, as well as the type strains of the phylogenetically closely related species/pathovars. Black circles indicate *X. translucens* strains isolated in Iran. Blue background indicates *X. translucens* pv. *undulosa* strains while red background indicates *X. translucens* pv. *translucens* pathovars. All the *X. translucens* pv. *undulosa* and *X. translucens* pv. *translucens* strains were clustered in a monophyletic clade.

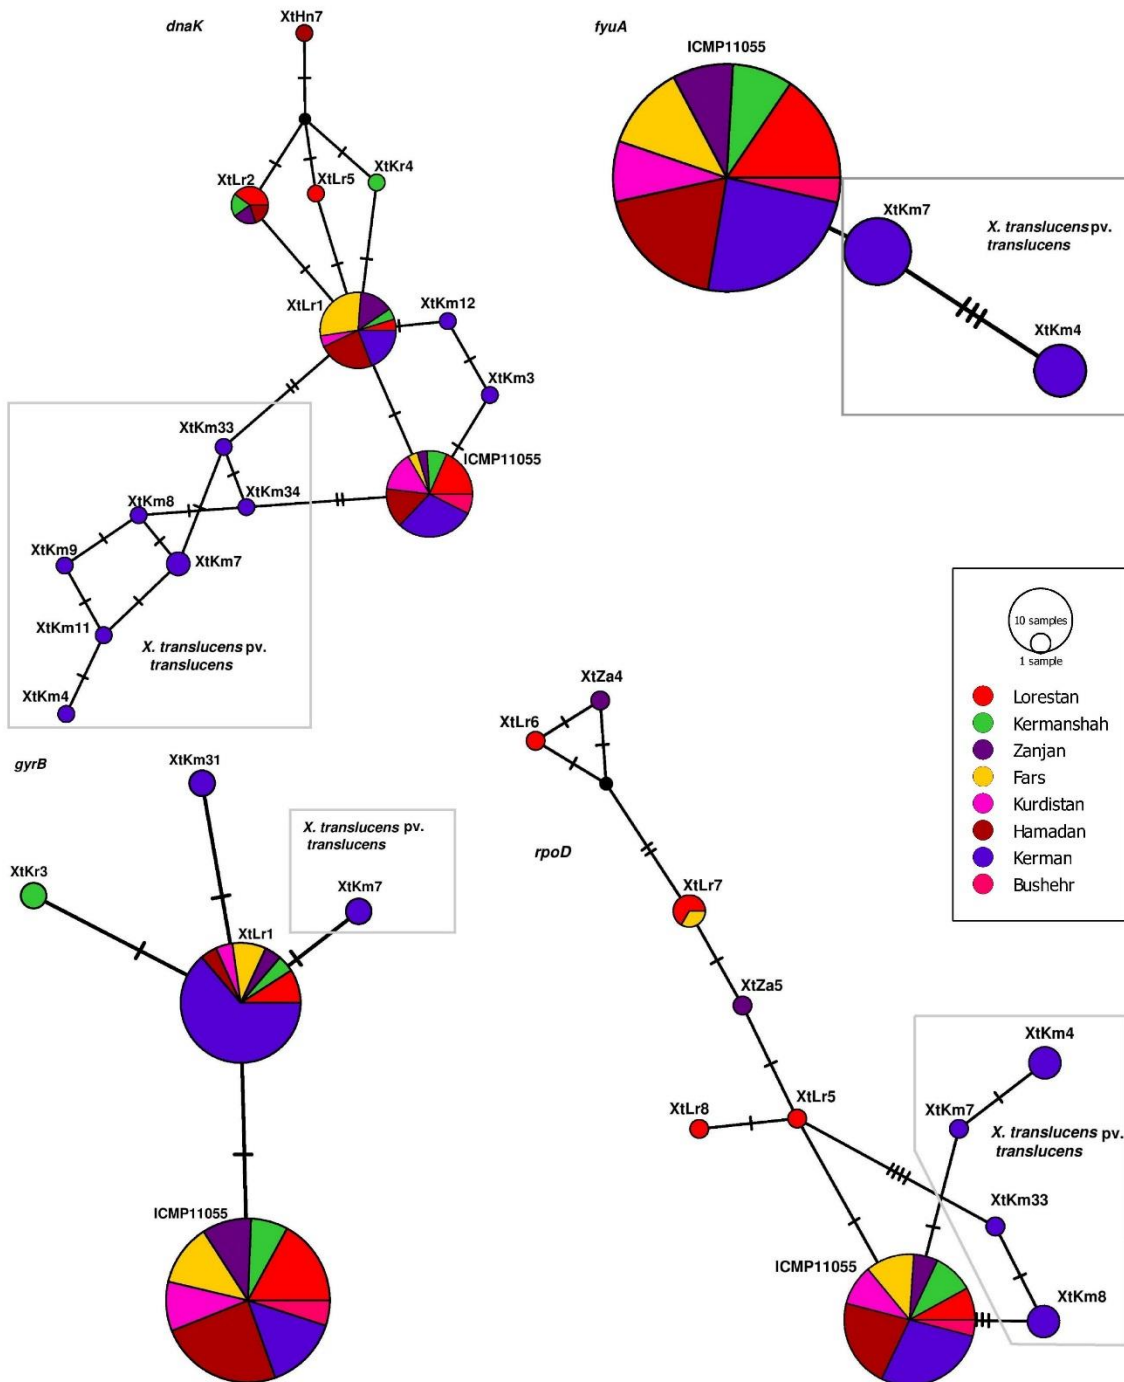

**Figure S3:** TCS haplotype network generated using POPArt program from the partial sequences of four housekeeping genes *dnaK*, *fyuA*, *gyrB*, and *rpoD* in 66 *Xanthomonas translucens* strains isolated in Iran. The size of the circles indicates the relative frequency of sequences belonging to a particular haplotype. Hatch marks along the branches indicate the number of mutations. Each color indicates a different geographic location (province) in Iran. *X. translucens* pv. *translucens* strains possessing unique ST and differing from the *X. translucens* pv. *undulosa* strains are framed by a grey box.

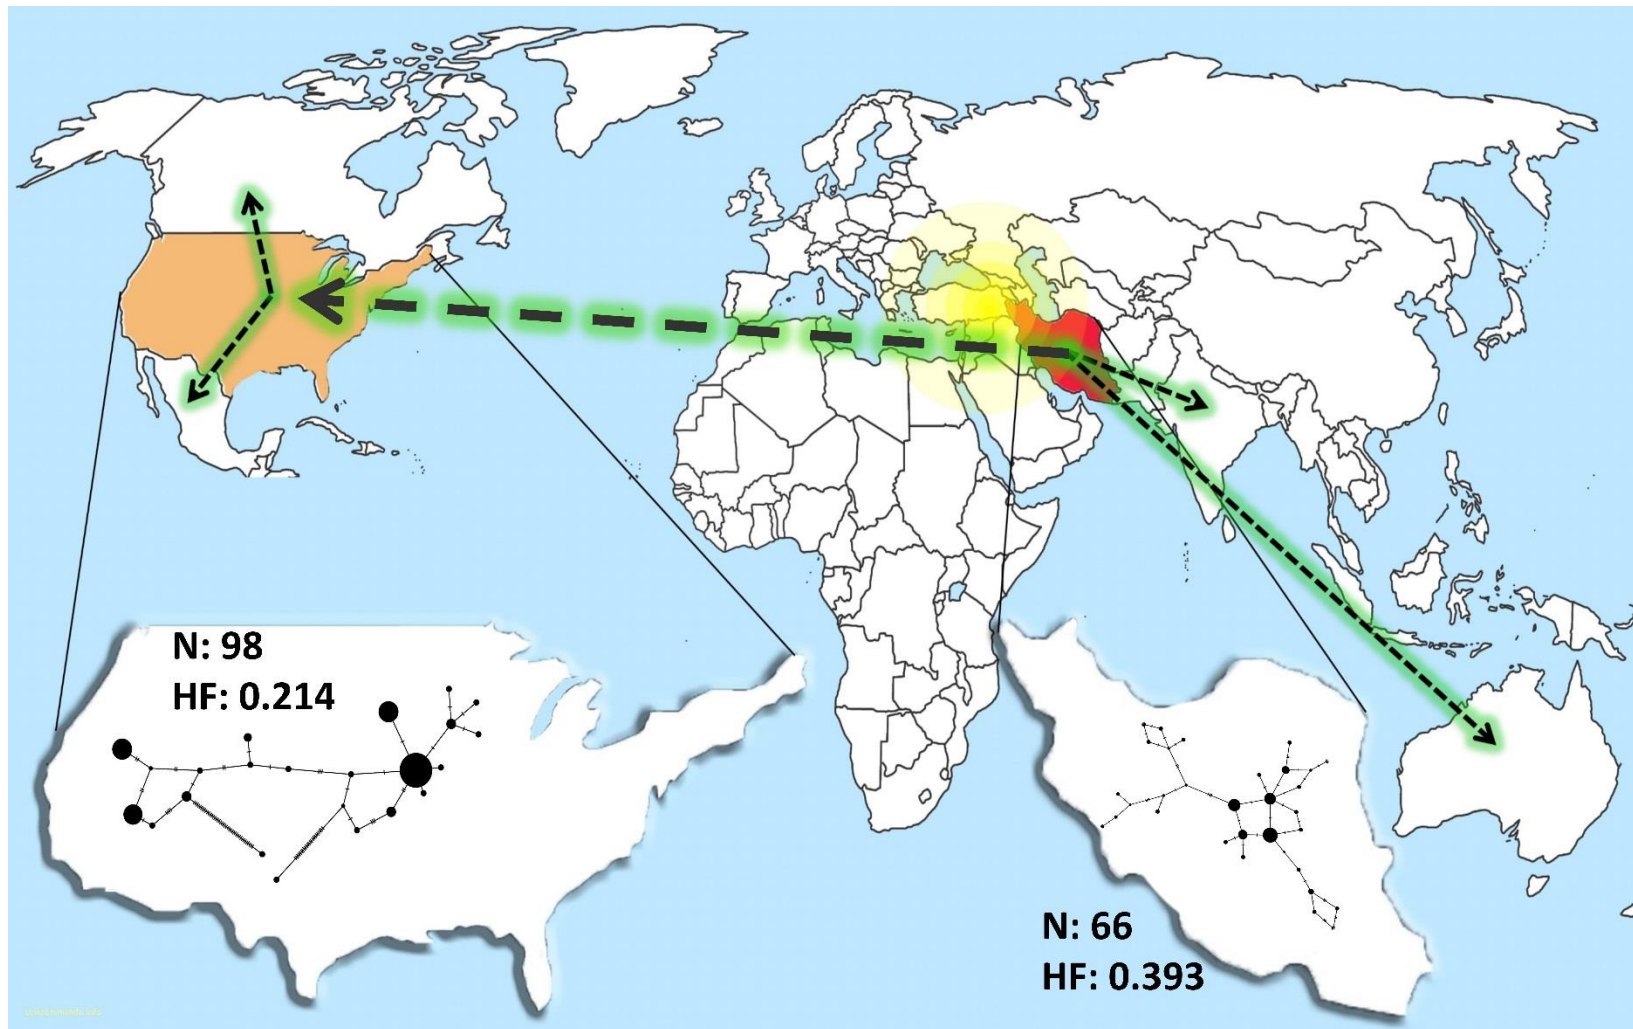

**Figure S4:** Worldwide distribution of *Xanthomonas translucens*, the causal agent of bacterial leaf streak on small-grain cereals. The center of origin of cultivated wheat in southern Turkey is marked by yellow concentric circles. Dashed arrows show the hypothetical transmission routes of *X. translucens* across the nations. TCS networks inside the zoomed-in map of Iran and the USA show MHs of the bacterial strains isolated in each country. Considering the higher haplotype frequency and richness in Iran, the Iranian plateau can be considered as the center of diversity of *X. translucens*. N: number of strains; HF: haplotype frequency.

The source map is from [https://commons.wikimedia.org/wiki/File:A\\_large\\_blank\\_world\\_map\\_with\\_oceans\\_marked\\_in\\_blue.PNG](https://commons.wikimedia.org/wiki/File:A_large_blank_world_map_with_oceans_marked_in_blue.PNG)

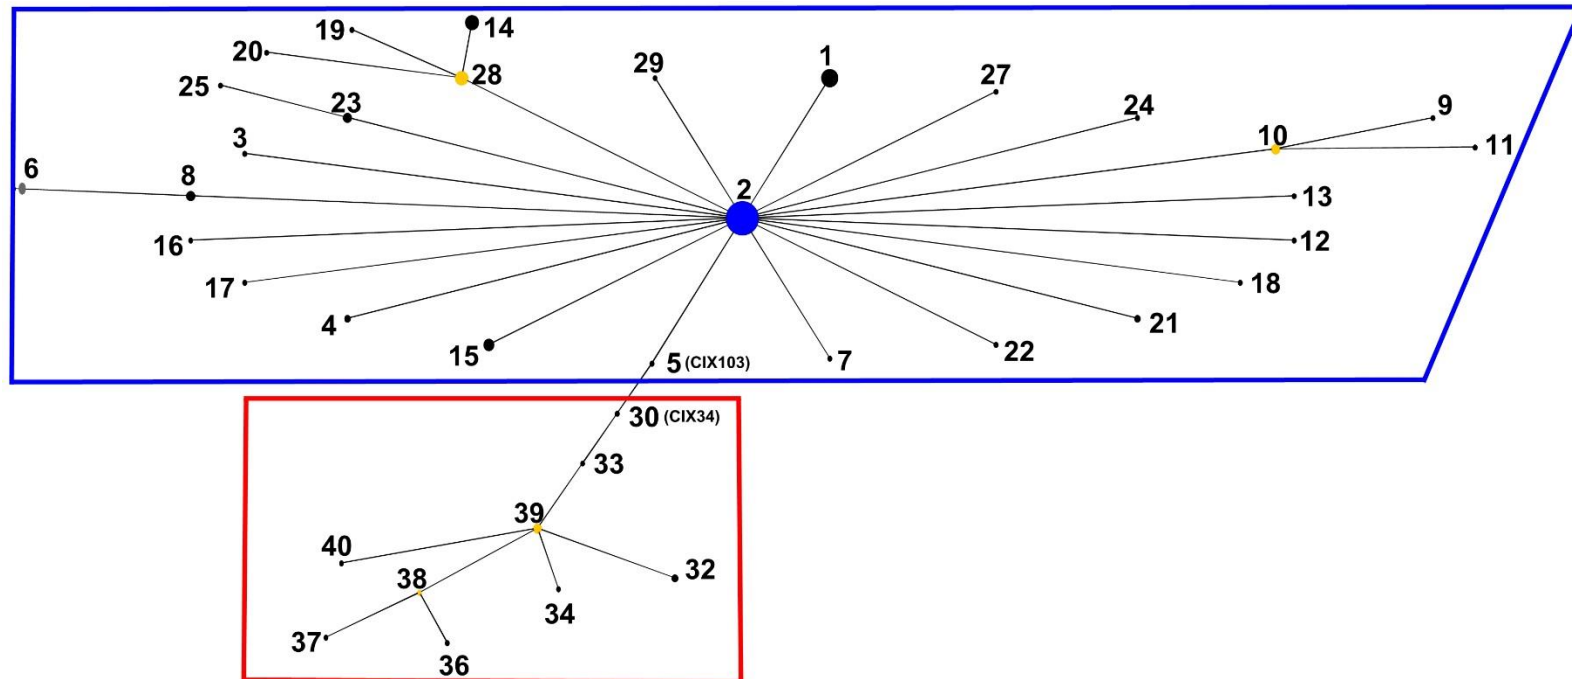

**Figure S5:** Analysis of worldwide collection of 178 *Xanthomonas translucens* strains using eBURST with the stringent (default) group definition in which, MHs are included within the same clonal complex only if they share identical alleles at three or four of the four MLST loci with at least one other MH in the population. The predicted primary founder of *X. translucens* pv. *undulosa*, MH2 (bootstrap confidence value of 99%) is shown as a blue circle while the descendent subgroups are shown as yellow circles. Numbers in the eBURST diagram correspond to MHs as shown in Table S1. The diameter of each circle corresponds to the abundance of the strains of the corresponding MH in the input data. *Xanthomonas translucens* pv. *translucens* (CIX34) and *X. translucens* pv. *undulosa* (CIX103) strains, which are single-locus variants, are specified in the diagram.

**Table S1:** *Xanthomonas translucens* strains of worldwide origin that were used in this study, their host plant, geographic area and date of isolation, as well as their Multilocus Haplotypes (MHs) and Sequence Types (STs) based on the partial sequences of four housekeeping genes (*i.e. dnaK, fyuA, gyrB, and rpoD*).

| Multilocus<br>haplotype (MH) | Strain | Country | Year | Host   | Sequence types (ST) |             |             |             | Accession numbers |             |             |             |
|------------------------------|--------|---------|------|--------|---------------------|-------------|-------------|-------------|-------------------|-------------|-------------|-------------|
|                              |        |         |      |        | <i>dnaK</i>         | <i>fyuA</i> | <i>gyrB</i> | <i>rpoD</i> | <i>dnaK</i>       | <i>fyuA</i> | <i>gyrB</i> | <i>rpoD</i> |
| 14                           | XtLr1  | Iran    | 2017 | Wheat  | 8                   | 1           | 6           | 4           | MK622011          | MK622076    | MK622141    | MK622206    |
| 23                           | XtLr2  | Iran    | 2017 | Wheat  | 9                   | 1           | 1           | 4           | MK622012          | MK622077    | MK622142    | MK622207    |
| 15                           | XtLr3  | Iran    | 2017 | Wheat  | 1                   | 1           | 6           | 4           | MK622013          | MK622078    | MK622143    | MK622208    |
| 2                            | XtLr4  | Iran    | 2016 | Wheat  | 1                   | 1           | 1           | 4           | MK622014          | MK622079    | MK622144    | MK622209    |
| 26                           | XtLr5  | Iran    | 2016 | Wheat  | 10                  | 1           | 1           | 5           | MK622015          | MK622080    | MK622145    | MK622210    |
| 18                           | XtLr6  | Iran    | 2016 | Wheat  | 1                   | 1           | 1           | 8           | MK622016          | MK622081    | MK622146    | MK622211    |
| 21                           | XtLr7  | Iran    | 2017 | Barley | 1                   | 1           | 1           | 10          | MK622017          | MK622082    | MK622147    | MK622212    |
| 25                           | XtLr8  | Iran    | 2016 | Wheat  | 9                   | 1           | 1           | 6           | MK622018          | MK622083    | MK622148    | MK622213    |
| 21                           | XtLr9  | Iran    | 2017 | Barley | 1                   | 1           | 1           | 10          | MK622019          | MK622084    | MK622149    | MK622214    |
| 14                           | XtKr1  | Iran    | 2016 | Wheat  | 8                   | 1           | 6           | 4           | MK622020          | MK622085    | MK622150    | MK622215    |
| 23                           | XtKr2  | Iran    | 2016 | Wheat  | 9                   | 1           | 1           | 4           | MK622021          | MK622086    | MK622151    | MK622216    |
| 16                           | XtKr3  | Iran    | 2016 | Wheat  | 1                   | 1           | 3           | 4           | MK622022          | MK622087    | MK622152    | MK622217    |
| 27                           | XtKr4  | Iran    | 2016 | Wheat  | 11                  | 1           | 1           | 4           | MK622023          | MK622088    | MK622153    | MK622218    |
| 2                            | XtKr5  | Iran    | 2016 | Wheat  | 1                   | 1           | 1           | 4           | MK622024          | MK622089    | MK622154    | MK622219    |
| 14                           | XtZa1  | Iran    | 2016 | Wheat  | 8                   | 1           | 6           | 4           | MK622025          | MK622090    | MK622155    | MK622220    |
| 23                           | XtZa2  | Iran    | 2016 | Wheat  | 9                   | 1           | 1           | 4           | MK622026          | MK622091    | MK622156    | MK622221    |
| 28                           | XtZa3  | Iran    | 2016 | Wheat  | 8                   | 1           | 1           | 4           | MK622027          | MK622092    | MK622157    | MK622222    |
| 19                           | XtZa4  | Iran    | 2016 | Wheat  | 8                   | 1           | 1           | 9           | MK622028          | MK622093    | MK622158    | MK622223    |
| 22                           | XtZa5  | Iran    | 2016 | Wheat  | 1                   | 1           | 1           | 7           | MK622029          | MK622094    | MK622159    | MK622224    |
| 28                           | XtFa1  | Iran    | 2016 | Wheat  | 8                   | 1           | 1           | 4           | MK622030          | MK622095    | MK622160    | MK622225    |
| 14                           | XtFa2  | Iran    | 2016 | Wheat  | 8                   | 1           | 6           | 4           | MK622031          | MK622096    | MK622161    | MK622226    |
| 14                           | XtFa3  | Iran    | 2016 | Wheat  | 8                   | 1           | 6           | 4           | MK622032          | MK622097    | MK622162    | MK622227    |
| 20                           | XtFa4  | Iran    | 2016 | Wheat  | 8                   | 1           | 1           | 10          | MK622033          | MK622098    | MK622163    | MK622228    |
| 28                           | XtFa5  | Iran    | 2016 | Wheat  | 8                   | 1           | 1           | 4           | MK622034          | MK622099    | MK622164    | MK622229    |
| 28                           | XtFa6  | Iran    | 2016 | Wheat  | 8                   | 1           | 1           | 4           | MK622035          | MK622100    | MK622165    | MK622230    |
| 2                            | XtFa7  | Iran    | 2016 | Wheat  | 1                   | 1           | 1           | 4           | MK622036          | MK622101    | MK622166    | MK622231    |
| 15                           | XtKn1  | Iran    | 2016 | Wheat  | 1                   | 1           | 6           | 4           | MK622037          | MK622102    | MK622167    | MK622232    |
| 28                           | XtKn2  | Iran    | 2016 | Wheat  | 8                   | 1           | 1           | 4           | MK622038          | MK622103    | MK622168    | MK622233    |
| 2                            | XtKn3  | Iran    | 2016 | Wheat  | 1                   | 1           | 1           | 4           | MK622039          | MK622104    | MK622169    | MK622234    |

|    |        |      |      |          |    |   |   |    |          |          |          |          |
|----|--------|------|------|----------|----|---|---|----|----------|----------|----------|----------|
| 2  | XtKn4  | Iran | 2016 | Wheat    | 1  | 1 | 1 | 4  | MK622040 | MK622105 | MK622170 | MK622235 |
| 2  | XtKn5  | Iran | 2016 | Wheat    | 1  | 1 | 1 | 4  | MK622041 | MK622106 | MK622171 | MK622236 |
| 28 | XtHn1  | Iran | 2017 | Wheat    | 8  | 1 | 1 | 4  | MK622042 | MK622107 | MK622172 | MK622237 |
| 14 | XtHn2  | Iran | 2017 | Wheat    | 8  | 1 | 6 | 4  | MK622043 | MK622108 | MK622173 | MK622238 |
| 2  | XtHn3  | Iran | 2017 | Wheat    | 1  | 1 | 1 | 4  | MK622044 | MK622109 | MK622174 | MK622239 |
| 2  | XtHn4  | Iran | 2016 | Wheat    | 1  | 1 | 1 | 4  | MK622045 | MK622110 | MK622175 | MK622240 |
| 2  | XtHn5  | Iran | 2016 | Wheat    | 1  | 1 | 1 | 4  | MK622046 | MK622111 | MK622176 | MK622241 |
| 28 | XtHn6  | Iran | 2016 | Wheat    | 8  | 1 | 1 | 4  | MK622047 | MK622112 | MK622177 | MK622242 |
| 24 | XtHn7  | Iran | 2016 | Wheat    | 12 | 1 | 1 | 4  | MK622048 | MK622113 | MK622178 | MK622243 |
| 23 | XtHn8  | Iran | 2016 | Wheat    | 9  | 1 | 1 | 4  | MK622049 | MK622114 | MK622179 | MK622244 |
| 28 | XtHn9  | Iran | 2017 | Barley   | 8  | 1 | 1 | 4  | MK622050 | MK622115 | MK622180 | MK622245 |
| 2  | XtHn10 | Iran | 2017 | Barley   | 1  | 1 | 1 | 4  | MK622051 | MK622116 | MK622181 | MK622246 |
| 28 | XtHn11 | Iran | 2017 | Barley   | 8  | 1 | 1 | 4  | MK622052 | MK622117 | MK622182 | MK622247 |
| 10 | XtKm3  | Iran | 2015 | Rye      | 5  | 1 | 1 | 4  | MK622053 | MK622118 | MK622183 | MK622248 |
| 44 | XtKm4  | Iran | 2015 | Barley   | 16 | 3 | 6 | 2  | MK622054 | MK622119 | MK622184 | MK622249 |
| 31 | XtKm7  | Iran | 2014 | Barley   | 18 | 2 | 4 | 1  | MK622055 | MK622120 | MK622185 | MK622250 |
| 38 | XtKm8  | Iran | 2014 | Barley   | 15 | 2 | 6 | 13 | MK622056 | MK622121 | MK622186 | MK622251 |
| 43 | XtKm9  | Iran | 2015 | Barley   | 20 | 3 | 1 | 2  | MK622057 | MK622122 | MK622187 | MK622252 |
| 14 | XtKm10 | Iran | 2015 | Barley   | 8  | 1 | 6 | 4  | MK622058 | MK622123 | MK622188 | MK622253 |
| 45 | XtKm11 | Iran | 2015 | Barley   | 17 | 3 | 6 | 2  | MK622059 | MK622124 | MK622189 | MK622254 |
| 13 | XtKm12 | Iran | 2015 | Wheat    | 7  | 1 | 1 | 4  | MK622060 | MK622125 | MK622190 | MK622255 |
| 15 | XtKm15 | Iran | 2015 | Ryegrass | 1  | 1 | 6 | 4  | MK622061 | MK622126 | MK622191 | MK622256 |
| 37 | XtKm18 | Iran | 2015 | Barley   | 18 | 2 | 6 | 13 | MK622062 | MK622127 | MK622192 | MK622257 |
| 14 | XtKm22 | Iran | 2008 | Wheat    | 8  | 1 | 6 | 4  | MK622063 | MK622128 | MK622193 | MK622258 |
| 14 | XtKm24 | Iran | 2008 | Wheat    | 8  | 1 | 6 | 4  | MK622064 | MK622129 | MK622194 | MK622259 |
| 15 | XtKm25 | Iran | 2015 | Wheat    | 1  | 1 | 6 | 4  | MK622065 | MK622130 | MK622195 | MK622260 |
| 15 | XtKm27 | Iran | 2015 | Wheat    | 1  | 1 | 6 | 4  | MK622066 | MK622131 | MK622196 | MK622261 |
| 2  | XtKm28 | Iran | 2009 | Wheat    | 1  | 1 | 1 | 4  | MK622067 | MK622132 | MK622197 | MK622262 |
| 2  | XtKm29 | Iran | 2015 | Wheat    | 1  | 1 | 1 | 4  | MK622068 | MK622133 | MK622198 | MK622263 |
| 14 | XtKm30 | Iran | 2015 | Wheat    | 8  | 1 | 6 | 4  | MK622069 | MK622134 | MK622199 | MK622264 |
| 17 | XtKm31 | Iran | 2015 | Wheat    | 1  | 1 | 5 | 4  | MK622070 | MK622135 | MK622200 | MK622265 |
| 35 | XtKm33 | Iran | 2009 | Barley   | 14 | 2 | 6 | 12 | MK622071 | MK622136 | MK622201 | MK622266 |
| 36 | XtKm34 | Iran | 2015 | Barley   | 13 | 2 | 6 | 13 | MK622072 | MK622137 | MK622202 | MK622267 |
| 15 | XtKm35 | Iran | 2015 | Wheat    | 1  | 1 | 6 | 4  | MK622073 | MK622138 | MK622203 | MK622268 |
| 2  | XtBu36 | Iran | 2017 | Wheat    | 1  | 1 | 1 | 4  | MK622074 | MK622139 | MK622204 | MK622269 |
| 2  | XtBu38 | Iran | 2017 | Wheat    | 1  | 1 | 1 | 4  | MK622075 | MK622140 | MK622205 | MK622270 |
| 2  | ICMP   | Iran | 1983 | Wheat    | 1  | 1 | 1 | 4  |          |          |          |          |
|    | 11055  |      |      |          |    |   |   |    | CP009750 | CP009750 | CP009750 | CP009750 |
| 40 | ICMP   | USA  | ND   | Barley   | 21 | 2 | 1 | 13 | PRJEB647 | PRJEB647 | PRJEB647 | PRJEB647 |

---

5752

|    |        |     |      |        |    |   |   |    |              |              |              |              |
|----|--------|-----|------|--------|----|---|---|----|--------------|--------------|--------------|--------------|
| 39 | B1     | USA | 2013 | Barley | 15 | 2 | 1 | 13 | KY801632     | KY814472     | KY801435     | KY801336     |
| 46 | B2     | USA | 2013 | Barley | 20 | 3 | 1 | 1  | LNSZ00000000 | LNSZ00000000 | LNSZ00000000 | LNSZ00000000 |
| 39 | B43    | ND  | 2006 | Rye    | 15 | 2 | 1 | 13 | KY801631     | KY814471     | KY801436     | KY801337     |
| 46 | B69    | USA | 2010 | Barley | 20 | 3 | 1 | 1  | KY801629     | KY814469     | KY801438     | KY801339     |
| 2  | B74    | USA | 2007 | Barley | 1  | 1 | 1 | 4  | KY801628     | KY814468     | KY801439     | KY801340     |
| 1  | B75    | USA | 2010 | Wheat  | 4  | 1 | 1 | 4  | KY801627     | KY814467     | KY801440     | KY801341     |
| 9  | BLSB3  | USA | ND   | Barley | 5  | 1 | 1 | 3  | MADS00000000 | MADS00000000 | MADS00000000 | MADS00000000 |
| 2  | BLSW16 | USA | 2008 | Wheat  | 1  | 1 | 1 | 4  | MADU00000000 | MADU00000000 | MADU00000000 | MADU00000000 |
| 46 | CIX20  | USA | 2010 | Barley | 20 | 3 | 1 | 1  | KY801624     | KY814464     | KY801443     | KY801344     |
| 46 | CIX21  | USA | 2010 | Barley | 20 | 3 | 1 | 1  | KY801623     | KY814463     | KY801444     | KY801345     |
| 46 | CIX22  | USA | 2010 | Barley | 20 | 3 | 1 | 1  | KY801622     | KY814462     | KY801445     | KY801346     |
| 1  | CIX23  | USA | 2010 | Wheat  | 4  | 1 | 1 | 4  | KY801621     | KY814461     | KY801446     | KY801347     |
| 46 | CIX26  | USA | 2010 | Barley | 20 | 3 | 1 | 1  | KY801620     | KY814460     | KY801447     | KY801348     |
| 46 | CIX28  | USA | 2010 | Barley | 20 | 3 | 1 | 1  | KY801619     | KY814459     | KY801448     | KY801349     |
| 46 | CIX29  | USA | 2010 | Barley | 20 | 3 | 1 | 1  | KY801618     | KY814458     | KY801449     | KY801350     |
| 46 | CIX30  | USA | 2010 | Barley | 20 | 3 | 1 | 1  | KY801617     | KY814457     | KY801450     | KY801351     |
| 2  | CIX31  | USA | 2010 | Wheat  | 1  | 1 | 1 | 4  | KY801616     | KY814456     | KY801451     | KY801352     |
| 2  | CIX32  | USA | 2010 | Barley | 1  | 1 | 1 | 4  | KY801615     | KY814455     | KY801452     | KY801353     |
| 46 | CIX33  | USA | 2010 | Wheat  | 20 | 3 | 1 | 1  | KY801614     | KY814454     | KY801453     | KY801354     |
| 30 | CIX34  | USA | 2010 | Barley | 15 | 1 | 1 | 11 | KY801613     | KY814453     | KY801454     | KY801355     |
| 2  | CIX35  | USA | 2010 | Wheat  | 1  | 1 | 1 | 4  | KY801612     | KY814452     | KY801455     | KY801356     |
| 10 | CIX36  | USA | 2010 | Wheat  | 5  | 1 | 1 | 4  | KY801611     | KY814451     | KY801456     | KY801357     |
| 1  | CIX37  | USA | 2010 | Wheat  | 4  | 1 | 1 | 4  | KY801610     | KY814450     | KY801457     | KY801358     |
| 2  | CIX38  | USA | 2010 | Wheat  | 1  | 1 | 1 | 4  | KY801609     | KY814449     | KY801458     | KY801359     |
| 1  | CIX39  | USA | 2010 | Wheat  | 4  | 1 | 1 | 4  | KY801608     | KY814448     | KY801459     | KY801360     |
| 2  | CIX40  | USA | 2010 | Wheat  | 1  | 1 | 1 | 4  | KY801607     | KY814447     | KY801460     | KY801361     |
| 41 | CIX41  | USA | 2009 | Barley | 20 | 3 | 1 | 14 | KY801606     | KY814446     | KY801461     | KY801362     |
| 2  | CIX42  | USA | 2009 | Wheat  | 1  | 1 | 1 | 4  | KY801605     | KY814445     | KY801462     | KY801363     |
| 33 | CIX43  | USA | 2009 | Barley | 15 | 2 | 1 | 11 | KY801604     | KY814444     | KY801463     | KY801364     |
| 2  | CIX44  | USA | 2009 | Wheat  | 1  | 1 | 1 | 4  | KY801603     | KY814443     | KY801464     | KY801365     |
| 41 | CIX45  | USA | 2009 | Barley | 20 | 3 | 1 | 14 | KY801602     | KY814442     | KY801465     | KY801366     |
| 41 | CIX46  | USA | 2009 | Barley | 20 | 3 | 1 | 14 | KY801601     | KY814441     | Y801466      | KY801367     |
| 2  | CIX47  | USA | 2009 | Wheat  | 1  | 1 | 1 | 4  | KY801600     | KY814440     | KY801467     | KY801368     |
| 2  | CIX48  | USA | 2009 | Wheat  | 1  | 1 | 1 | 4  | KY801599     | KY814439     | KY801468     | KY801369     |
| 2  | CIX49  | USA | 2009 | Wheat  | 1  | 1 | 1 | 4  | KY801598     | KY814438     | KY801469     | KY801370     |
| 2  | CIX50  | USA | 2009 | Wheat  | 1  | 1 | 1 | 4  | KY801597     | KY814437     | KY801470     | KY801371     |
| 2  | CIX51  | USA | 2009 | Wheat  | 1  | 1 | 1 | 4  | KY801596     | KY814436     | KY801471     | KY801372     |
| 41 | CIX52  | USA | 2009 | Barley | 20 | 3 | 1 | 14 | KY801595     | KY814435     | KY801472     | KY801373     |

---



|    |        |     |      |                   |    |   |   |    |          |          |          |          |
|----|--------|-----|------|-------------------|----|---|---|----|----------|----------|----------|----------|
| 10 | CIX53  | USA | 2010 | Wheat             | 5  | 1 | 1 | 4  | KY801594 | KY814434 | KY801473 | KY801374 |
| 10 | CIX54  | USA | 2010 | Wheat             | 5  | 1 | 1 | 4  | KY801593 | KY814433 | KY801474 | KY801375 |
| 32 | CIX76  | USA | 2011 | Barley            | 15 | 2 | 1 | 4  | KY801592 | KY814432 | KY801475 | KY801376 |
| 41 | CIX78  | USA | 2011 | Barley            | 20 | 3 | 1 | 14 | KY801591 | KY814431 | KY801476 | KY801377 |
| 41 | CIX79  | USA | 2011 | Barley            | 20 | 3 | 1 | 14 | KY801590 | KY814430 | KY801477 | KY801378 |
| 41 | CIX81  | USA | 2011 | Barley            | 20 | 3 | 1 | 14 | KY801589 | KY814429 | KY801478 | KY801379 |
| 41 | CIX82  | USA | 2011 | Barley            | 20 | 3 | 1 | 14 | KY801588 | KY814428 | KY801479 | KY801380 |
| 46 | CIX84  | USA | 2011 | Barley            | 20 | 3 | 1 | 1  | KY801587 | KY814427 | KY801480 | KY801381 |
| 41 | CIX85  | USA | 2011 | Barley            | 20 | 3 | 1 | 14 | KY801586 | KY814426 | KY801481 | KY801382 |
| 46 | CIX86  | USA | 2011 | Barley            | 20 | 3 | 1 | 1  | KY801585 | KY814425 | KY801482 | KY801383 |
| 39 | CIX87  | USA | 2011 | Barley            | 15 | 2 | 1 | 13 | KY801584 | KY814424 | KY801483 | KY801384 |
| 1  | CIX88  | USA | 2011 | Wheat             | 4  | 1 | 1 | 4  | KY801583 | KY814423 | KY801484 | KY801385 |
| 32 | CIX90  | USA | 2011 | Barley            | 15 | 2 | 1 | 4  | KY801582 | KY814422 | KY801485 | KY801386 |
| 2  | CIX91  | USA | 2011 | Wheat             | 1  | 1 | 1 | 4  | KY801581 | KY814421 | KY801486 | KY801387 |
| 41 | CIX92  | USA | 2011 | Barley            | 20 | 3 | 1 | 14 | KY801580 | KY814420 | KY801487 | KY801388 |
| 41 | CIX94  | USA | 2011 | Barley            | 20 | 3 | 1 | 14 | KY801579 | KY814419 | KY801488 | KY801389 |
| 41 | CIX95  | USA | 2011 | Barley            | 20 | 3 | 1 | 14 | KY801578 | KY814418 | KY801489 | KY801390 |
| 8  | CIX102 | USA | 2011 | Wheat             | 3  | 1 | 1 | 4  | KY801576 | KY814416 | KY801491 | KY801392 |
| 5  | CIX103 | USA | 2011 | Wheat             | 1  | 1 | 1 | 11 | KY801575 | KY814415 | KY801492 | KY801393 |
| 2  | CIX104 | USA | 2011 | Wheat             | 1  | 1 | 1 | 4  | KY801574 | KY814414 | KY801493 | KY801394 |
| 1  | CIX105 | USA | 2011 | Wheat             | 4  | 1 | 1 | 4  | KY801573 | KY814413 | KY801494 | KY801395 |
| 1  | CIX106 | USA | 2011 | Wheat             | 4  | 1 | 1 | 4  | KY801572 | KY814412 | KY801495 | KY801396 |
| 2  | CIX107 | USA | 2011 | Wheat             | 1  | 1 | 1 | 4  | KY801571 | KY814411 | KY801496 | KY801397 |
| 2  | CIX109 | USA | 2011 | Wheat             | 1  | 1 | 1 | 4  | KY801570 | KY814410 | KY801497 | KY801398 |
| 1  | CIX125 | USA | 2011 | Wheat             | 4  | 1 | 1 | 4  | KY801568 | KY814408 | KY801499 | KY801400 |
| 42 | CIX126 | USA | 2013 | Wheat             | 20 | 3 | 1 | 13 | KY801567 | KY814407 | KY801500 | KY801401 |
| 7  | CIX127 | USA | 2013 | Wheat             | 1  | 1 | 1 | 15 | KY801566 | KY814406 | KY801501 | KY801402 |
| 2  | CIX128 | USA | 2013 | Wheat             | 1  | 1 | 1 | 4  | KY801565 | KY814405 | KY801502 | KY801403 |
| 2  | CIX129 | USA | 2013 | Wheat             | 1  | 1 | 1 | 4  | KY801564 | KY814404 | KY801503 | KY801404 |
| 2  | CIX130 | USA | 2013 | Wheat             | 1  | 1 | 1 | 4  | KY801563 | KY814403 | KY801504 | KY801405 |
| 1  | CIX131 | USA | 2011 | Wheat             | 4  | 1 | 1 | 4  | KY801562 | KY814402 | KY801505 | KY801406 |
| 46 | CIX132 | USA | 2013 | Barley            | 20 | 3 | 1 | 1  | KY801561 | KY814401 | KY801506 | KY801407 |
| 2  |        |     |      | <i>Thinopyru</i>  | 1  | 1 | 1 | 4  |          |          |          |          |
|    |        |     |      | <i>m</i>          |    |   |   |    |          |          |          |          |
|    |        |     |      | <i>intermediu</i> |    |   |   |    |          |          |          |          |
|    | CIX133 | USA | 2012 | <i>m</i>          |    |   |   |    | KY801560 | KY814400 | KY801507 | KY801408 |
| 2  |        |     |      | <i>Thinopyru</i>  | 1  | 1 | 1 | 4  |          |          |          |          |
|    |        |     |      | <i>m</i>          |    |   |   |    |          |          |          |          |
|    | CIX134 | USA | 2013 | <i>intermediu</i> |    |   |   |    | KY801559 | KY814399 | KY801508 | KY801409 |

|    |           |     |      |                   |    |   |   |    |              |              |              |              |  |
|----|-----------|-----|------|-------------------|----|---|---|----|--------------|--------------|--------------|--------------|--|
|    |           |     |      | <i>m</i>          |    |   |   |    |              |              |              |              |  |
| 1  |           |     |      | <i>Thinopyru</i>  | 4  | 1 | 1 | 4  |              |              |              |              |  |
|    |           |     |      | <i>m</i>          |    |   |   |    |              |              |              |              |  |
|    |           |     |      | <i>intermediu</i> |    |   |   |    |              |              |              |              |  |
|    | CIX135    | USA | 2012 | <i>m</i>          |    |   |   |    | KY801558     | KY814398     | KY801509     | KY801410     |  |
| 2  | CR31      | USA | 2009 | Wheat             | 1  | 1 | 1 | 4  | LNJV00000000 | LNJV00000000 | LNJV00000000 | LNJV00000000 |  |
| 2  | CS2       | USA | 2009 | Wheat             | 1  | 1 | 1 | 4  | LNVK00000000 | LNVK00000000 | LNVK00000000 | LNVK00000000 |  |
| 2  | CS22      | USA | 2009 | Wheat             | 1  | 1 | 1 | 4  | LNVL00000000 | LNVL00000000 | LNVL00000000 | LNVL00000000 |  |
| 3  | CS4       | USA | 2009 | Wheat             | 2  | 1 | 1 | 4  | LNVM00000000 | LNVM00000000 | LNVM00000000 | LNVM00000000 |  |
| 2  | LB10      | USA | 2009 | Wheat             | 1  | 1 | 1 | 4  | KY801557     | KY814397     | KY801510     | KY801411     |  |
| 2  | LB5       | USA | 2009 | Wheat             | 1  | 1 | 1 | 4  | LNSS00000000 | LNSS00000000 | LNSS00000000 | LNSS00000000 |  |
| 1  | LG48      | USA | 2009 | Wheat             | 4  | 1 | 1 | 4  | LNVO00000000 | LNVO00000000 | LNVO00000000 | LNVO00000000 |  |
| 34 | LMG876    | USA | 1933 | Barley            | 15 | 2 | 1 | 14 | KY801548     | KY814388     | KY801519     | KY801420     |  |
| 2  | LW16      | USA | 2009 | Wheat             | 1  | 1 | 1 | 4  | KY801544     | KY814384     | KY801523     | KY801424     |  |
| 1  | NARK-1    | USA | 2010 | Wheat             | 4  | 1 | 1 | 4  | MADT00000000 | MADT00000000 | MADT00000000 | MADT00000000 |  |
| 8  | P3        | USA | 2009 | Wheat             | 3  | 1 | 1 | 4  | LNVR00000000 | LNVR00000000 | LNVR00000000 | LNVR00000000 |  |
| 2  | SIMT-07   | USA | 2007 | Barley            | 1  | 1 | 1 | 4  | MADQ00000000 | MADQ00000000 | MADQ00000000 | MADQ00000000 |  |
| 1  | SLV-2     | USA | 2010 | Barley            | 4  | 1 | 1 | 4  | MADR00000000 | MADR00000000 | MADR00000000 | MADR00000000 |  |
| 2  | XctSD-001 | USA | 2008 | Wheat             | 1  | 1 | 1 | 4  |              |              |              |              |  |
| 6  | XctSD-002 | USA | 2008 | Wheat             | 3  | 1 | 1 | 14 | KY801543     | KY814383     | KY801524     | KY801425     |  |
| 2  | XctSD-003 | USA | 2008 | Wheat             | 1  | 1 | 1 | 4  | KY801542     | KY814382     | KY801525     | KY801426     |  |
| 2  | XctSD-004 | USA | 2008 | Wheat             | 1  | 1 | 1 | 4  | KY801541     | KY814381     | KY801526     | KY801427     |  |
| 2  | XctSD-005 | USA | 2008 | Wheat             | 1  | 1 | 1 | 4  | KY801540     | KY814380     | KY801527     | KY801428     |  |
| 8  | XctSD-006 | USA | 2008 | Wheat             | 3  | 1 | 1 | 4  | KY801539     | KY814379     | KY801528     | KY801429     |  |
| 11 | XctSD-008 | USA | 2009 | Wheat             | 5  | 1 | 1 | 1  | KY801538     | KY814378     | KY801529     | KY801430     |  |
| 12 | XctSD-009 | USA | 2009 | Wheat             | 6  | 1 | 1 | 4  | KY801537     | KY814377     | KY801530     | KY801431     |  |
| 4  | XctSD-010 | USA | 2009 | Wheat             | 1  | 1 | 2 | 4  | KY801536     | KY814376     | KY801531     | KY801432     |  |
| 2  | XctSD-017 | USA | 2008 | Wheat             | 1  | 1 | 1 | 4  | KY801535     | KY814375     | KY801532     | KY801433     |  |
| 2  | XT-Rocky  | USA | 2009 | Wheat             | 1  | 1 | 1 | 4  | KY801534     | KY814374.1   | KY801533     | KY801434     |  |
|    |           |     |      |                   |    |   |   |    | LNST00000000 | LNST00000000 | LNST00000000 | LNST00000000 |  |

|    |         |             |      |           |    |   |   |    |              |              |              |              |
|----|---------|-------------|------|-----------|----|---|---|----|--------------|--------------|--------------|--------------|
| 2  | DAR6145 |             | 1988 | Wheat     | 1  | 1 | 1 | 4  |              |              |              |              |
|    | 4       | Australia   |      |           |    |   |   |    | AMXY00000000 | AMXY00000000 | AMXY00000000 | AMXY00000000 |
| 2  | LMG883  | Canada      | 1966 | Rye       | 1  | 1 | 1 | 4  | KY801547     | KY814387     | KY801520     | KY801421     |
| 2  |         |             | 1966 | Khorasan  | 1  | 1 | 1 | 4  |              |              |              |              |
|    | LMG892  | Canada      |      | wheat     |    |   |   |    | KY801546     | KY814386     | KY801521     | KY801422     |
| 2  | XT5523  | Canada      | 1966 | 1999      | 1  | 1 | 1 | 4  | LNVT00000000 | LNVT00000000 | LNVT00000000 | LNVT00000000 |
| 8  | XT5770  | Canada      | ND   | ND        | 3  | 1 | 1 | 4  | LNVT00000000 | LNVT00000000 | LNVT00000000 | LNVT00000000 |
| 4  | XT5791  | Canada      | 1969 | Wheat     | 1  | 1 | 2 | 4  | LNVT00000000 | LNVT00000000 | LNVT00000000 | LNVT00000000 |
| 46 | XT8     | Canada      | 1942 | Barley    | 20 | 3 | 1 | 1  | LNVT00000000 | LNVT00000000 | LNVT00000000 | LNVT00000000 |
| 43 | UPB458  | India       | 1970 | Barley    | 20 | 3 | 1 | 2  | LWSV00000000 | LWSV00000000 | LWSV00000000 | LWSV00000000 |
| 1  | UPB513  | Mexico      | 1987 | Wheat     | 4  | 1 | 1 | 4  | MADV00000000 | MADV00000000 | MADV00000000 | MADV00000000 |
| 39 | DSM1897 |             | 1933 | Barley    | 15 | 2 | 1 | 13 |              |              |              |              |
|    | 4       | USA         |      |           |    |   |   |    | CAPJ01000000 | CAPJ01000000 | CAPJ01000000 | CAPJ01000000 |
| 2  | LG54    | USA         | 2009 | Wheat     | 1  | 1 | 1 | 4  | LNVP00000000 | LNVP00000000 | LNVP00000000 | LNVP00000000 |
| 46 | UPB787  | Paraguay    | 1990 | Barley    | 20 | 3 | 1 | 1  | JTEM00000000 | JTEM00000000 | JTEM00000000 | JTEM00000000 |
| 29 | XT130   | Canada      | 1939 | ND        | 13 | 1 | 1 | 4  | LNVS00000000 | LNVS00000000 | LNVS00000000 | LNVS00000000 |
| 1  | Xtu4699 | USA         | 1999 | Wheat     | 4  | 1 | 1 | 4  | CP008714     | CP008714     | CP008714     | CP008714     |
| 47 |         |             | 1978 | Rough     | 19 | 4 | 7 | 4  |              |              |              |              |
|    | LMG728  | Switzerland |      | bluegrass |    |   |   |    | KY801552     | KY814392     | KY801515     | KY801416     |

The MH numbering in this Table is the same as in Figure 2 and Figure S5.
